# Supplementary material for: NanoSIMS observations of mouse retinal cells reveal strict metabolic controls on nitrogen turnover
Source: Springer Nature journal article supplement (doi:10.1186/s12860-020-00339-1), 2021-01-11

# Supplemental Information for: *NanoSIMS observations of protein turnover in retinal cells*

Elisa A. Bonnin, Eugenio F. Fornasiero, Felix Lange, Christoph W. Turck, Silvio O. Rizzoli

## Table of Contents

|                                      |    |
|--------------------------------------|----|
| Statistical Tables .....             | 2  |
| Histology Images .....               | 2  |
| 5 days ONL .....                     | 3  |
| 5 days INL .....                     | 4  |
| 14 days ONL .....                    | 5  |
| 14 days INL .....                    | 6  |
| 21 days INL .....                    | 8  |
| 60 days ONL .....                    | 10 |
| 60 days INL .....                    | 12 |
| Histograms of Average N Ratios ..... | 13 |
| 5 days .....                         | 13 |
| 14 days .....                        | 14 |
| 21 days .....                        | 16 |
| 60 days .....                        | 18 |
| P56 Mice .....                       | 19 |

## Statistical Tables

Tables S1, S2, and S3 below show the results from statistical testing. All statistical tests used were two sample t-tests assuming equal variances. All three tables display the results of a one-tailed test, which tests whether the second group has a mean statistically higher than that of the first group ( $H_0: \mu_2 \leq \mu_1$ ). The null hypothesis is considered rejected when  $p < 0.05$  ( $\alpha = 0.95$ ) and the t-statistic is negative.

**TABLE S1.** Results from statistical testing between different cellular regions for each treatment.

| Test                   | 5 day              |                  | 14 day             |        | 21 day             |                  | 60 day             |        |
|------------------------|--------------------|------------------|--------------------|--------|--------------------|------------------|--------------------|--------|
|                        | p                  | t stat           | p                  | t stat | p                  | t stat           | p                  | t stat |
| ONL Nuc $\leq$ ONL Cyt | 0.000              | -18.0            | 0.000              | -11.7  | 0.000              | -9.6             | 0.000              | -7.2   |
| ONL Nuc $\leq$ INL Nuc | 0.062 <sup>1</sup> | -1.6             | 0.097 <sup>1</sup> | -1.3   | 0.145 <sup>1</sup> | -1.1             | 0.422 <sup>1</sup> | -0.2   |
| INL Nuc $\leq$ INL Cyt | 0.000              | -5.4             | 0.000              | -5.4   | 0.000              | -9.2             | 0.000              | -5.3   |
| ONL Cyt $\leq$ INL Cyt | 0.001              | 3.3 <sup>2</sup> | 0.125 <sup>1</sup> | 1.2    | 0.045              | 1.7 <sup>2</sup> | 0.250 <sup>1</sup> | 0.7    |
| ONL Nuc $\leq$ OPL     | 0.000              | -14.3            | 0.000              | -14.9  | 0.000              | -11.5            | 0.000              | -14.2  |
| INL Nuc $\leq$ OPL     | 0.000              | -11.1            | 0.000              | -9.3   | 0.000              | -9.2             | 0.000              | -8.8   |

<sup>1</sup> the trend is not statistically significant

<sup>2</sup> the trend is significant in the opposite direction ( $\mu_2 \leq \mu_1$ ).

**TABLE S2.** Results from statistical testing between different experimental time points for each cellular region.

| Test                   | ONL Nucleus |        | ONL Cytosol |        | INL Nucleus |        | INL Cytosol |        | OPL   |        |
|------------------------|-------------|--------|-------------|--------|-------------|--------|-------------|--------|-------|--------|
|                        | p           | t stat | p           | t stat | p           | t stat | p           | t stat | p     | t stat |
| 5 days $\leq$ 14 days  | 0.000       | -19.8  | 0.000       | -21.2  | 0.000       | -18.3  | 0.000       | -14.7  | 0.000 | -13.2  |
| 14 days $\leq$ 21 days | 0.000       | -3.4   | 0.000       | -4.1   | 0.004       | -3.0   | 0.015       | -2.4   | 0.009 | -2.7   |
| 21 days $\leq$ 60 days | 0.000       | -11.3  | 0.000       | -9.4   | 0.000       | -8.62  | 0.000       | -10.4  | 0.000 | -5.8   |

**TABLE S3.** Results from statistical testing between different cellular regions in the P56 mice.

| Test           | p     | t stat |
|----------------|-------|--------|
| ONL $\leq$ INL | 0.000 | -23.3  |
| ONL $\leq$ OPL | 0.000 | -41.1  |
| INL $\leq$ OPL | 0.000 | -17.3  |

## Histology Images

All histology images were obtained using an Axio Imager M2 upright microscope (Zeiss, Germany), and a 100x ACHROPLAN water-immersion objective (Zeiss, Germany). Samples were immersed in ddH<sub>2</sub>O for analysis.

5 days ONL

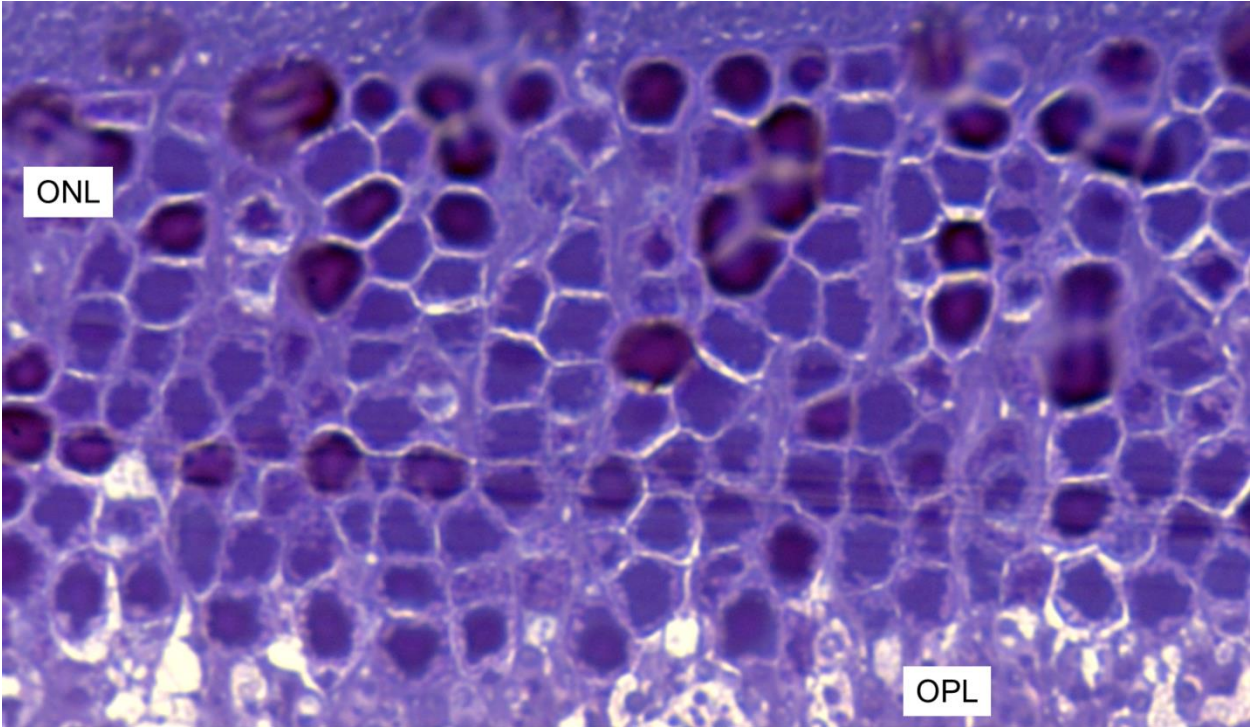

10  $\mu$ m

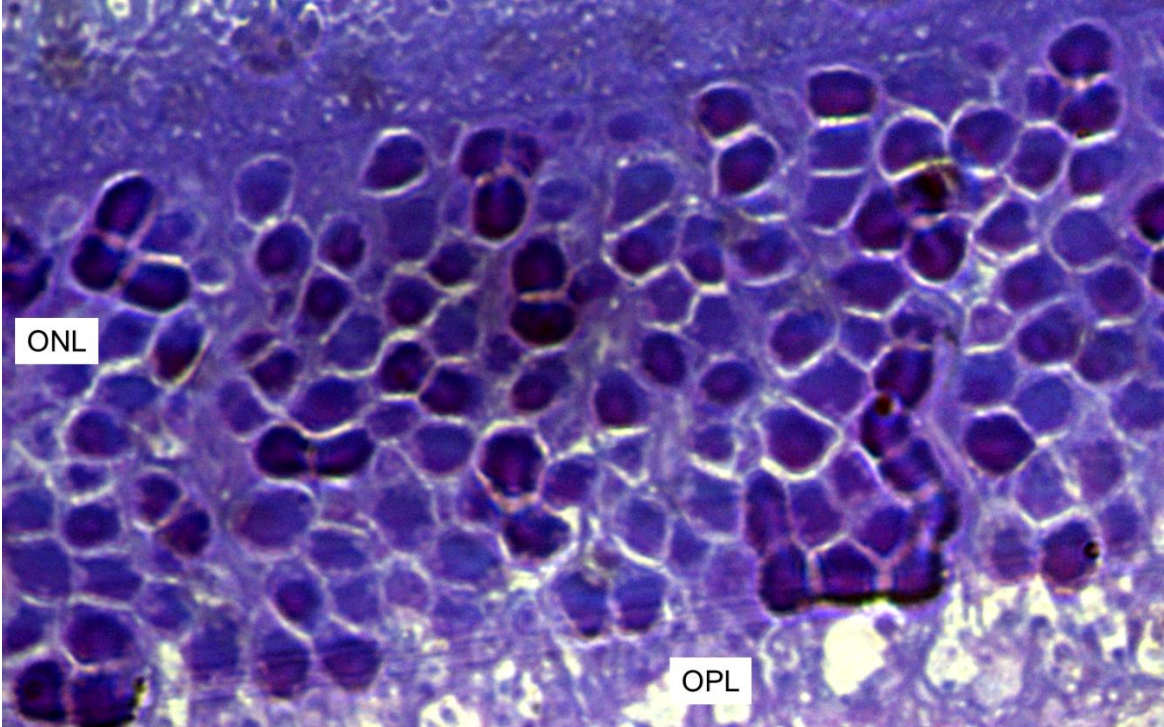

10  $\mu$ m

5 days INL

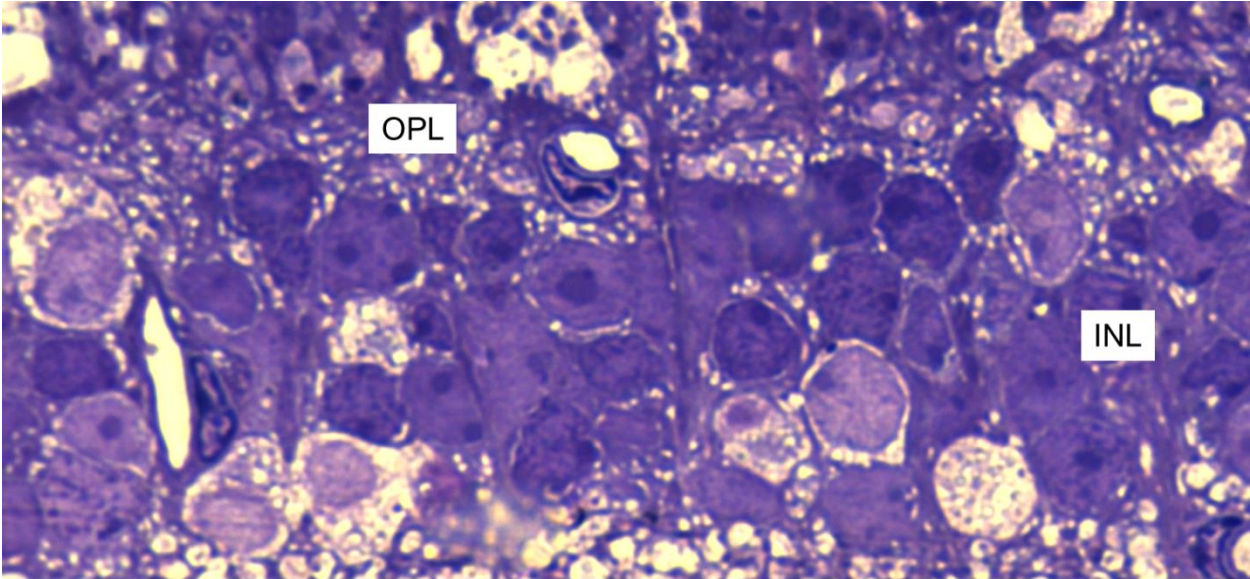

10 μm

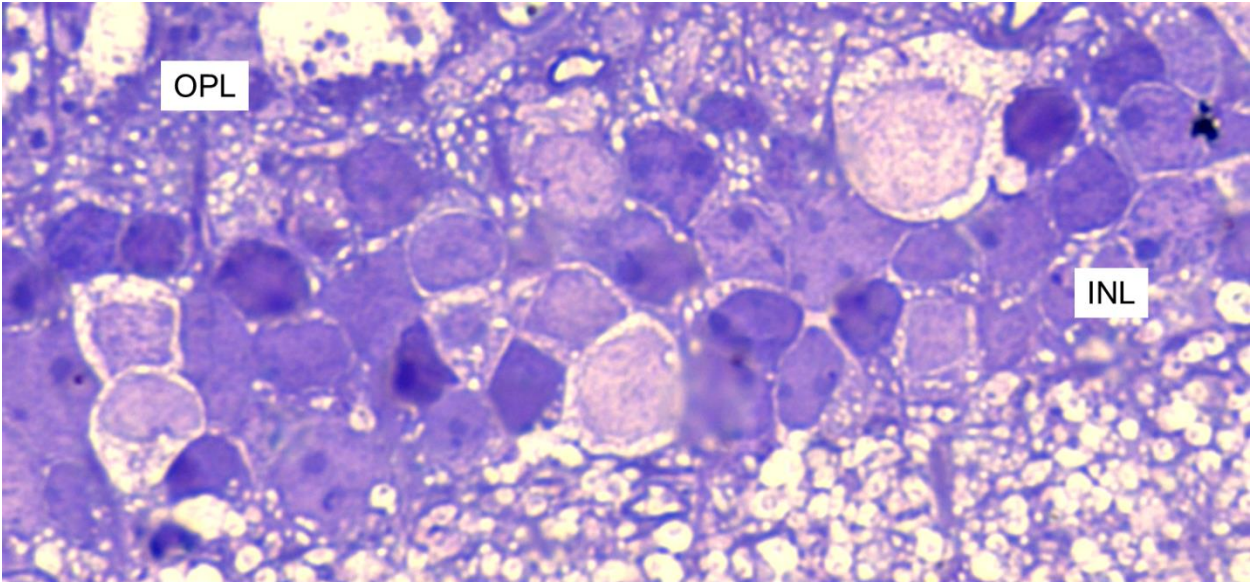

10 μm

14 days ONL

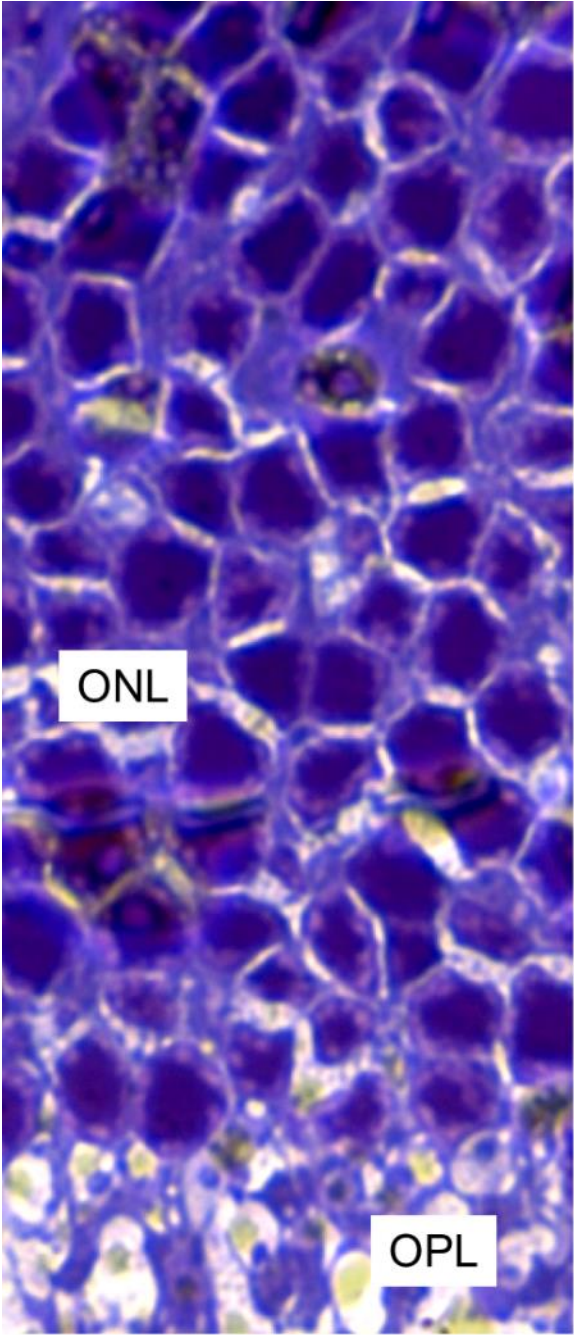

OPL

10 μm

14 days INL

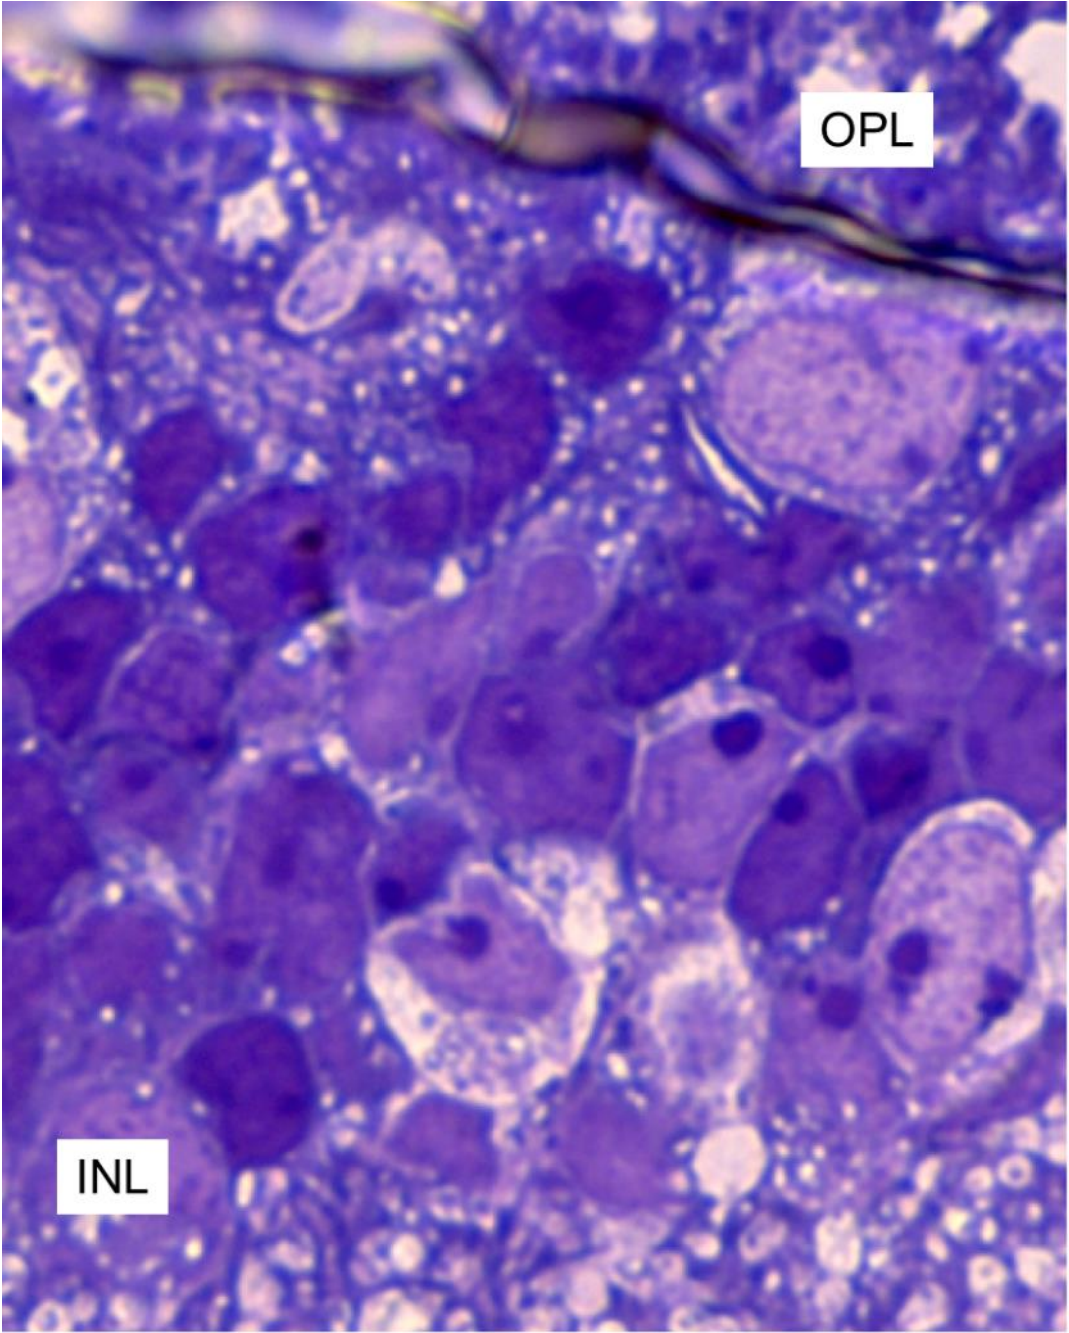

10  $\mu$ m

21 days ONL

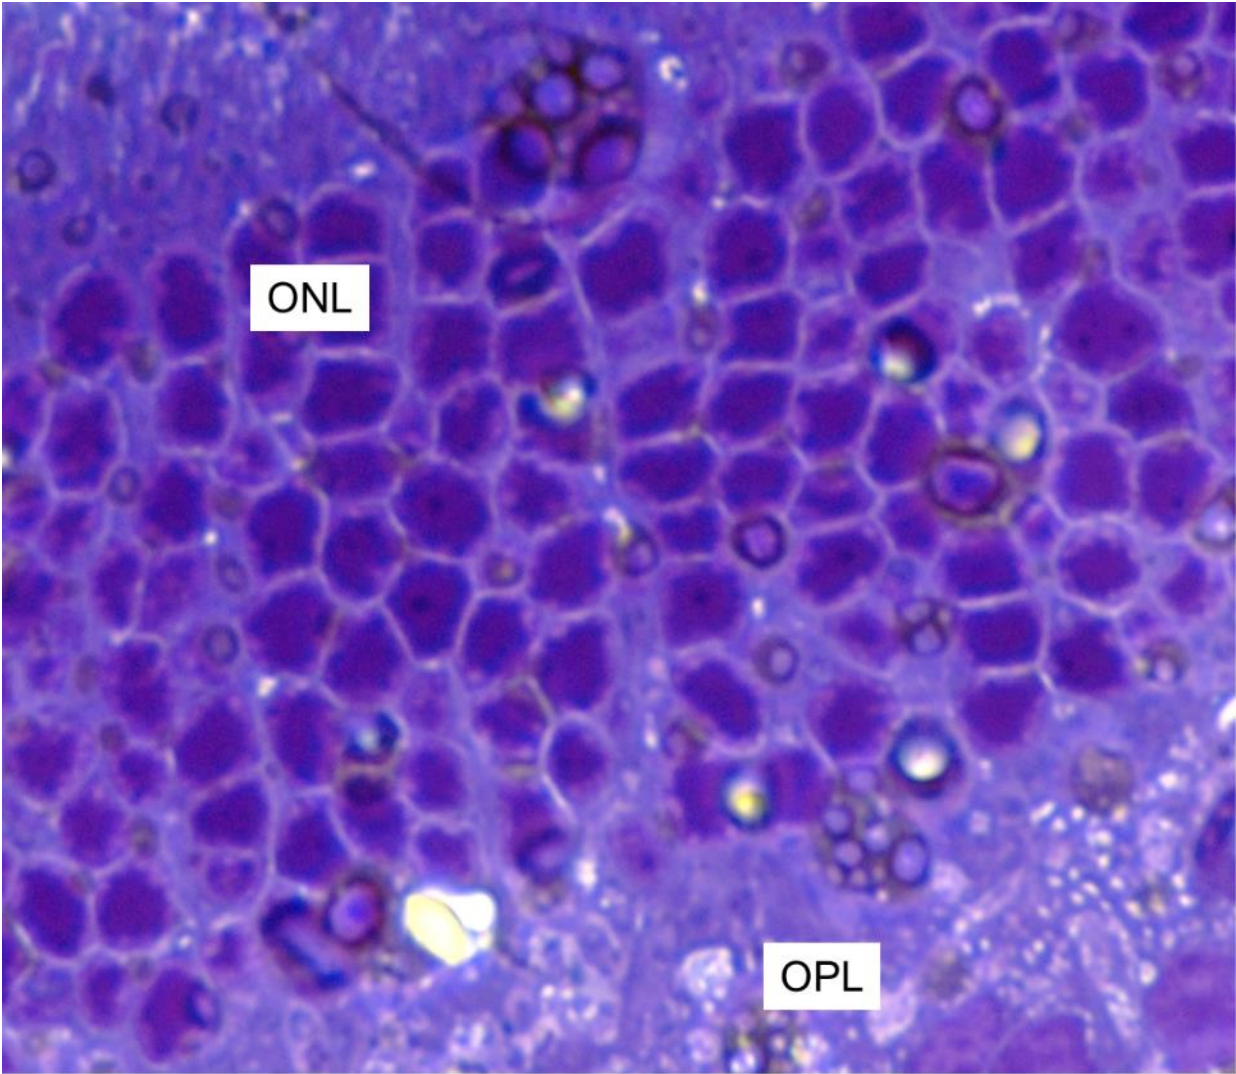

10  $\mu$ m

21 days INL

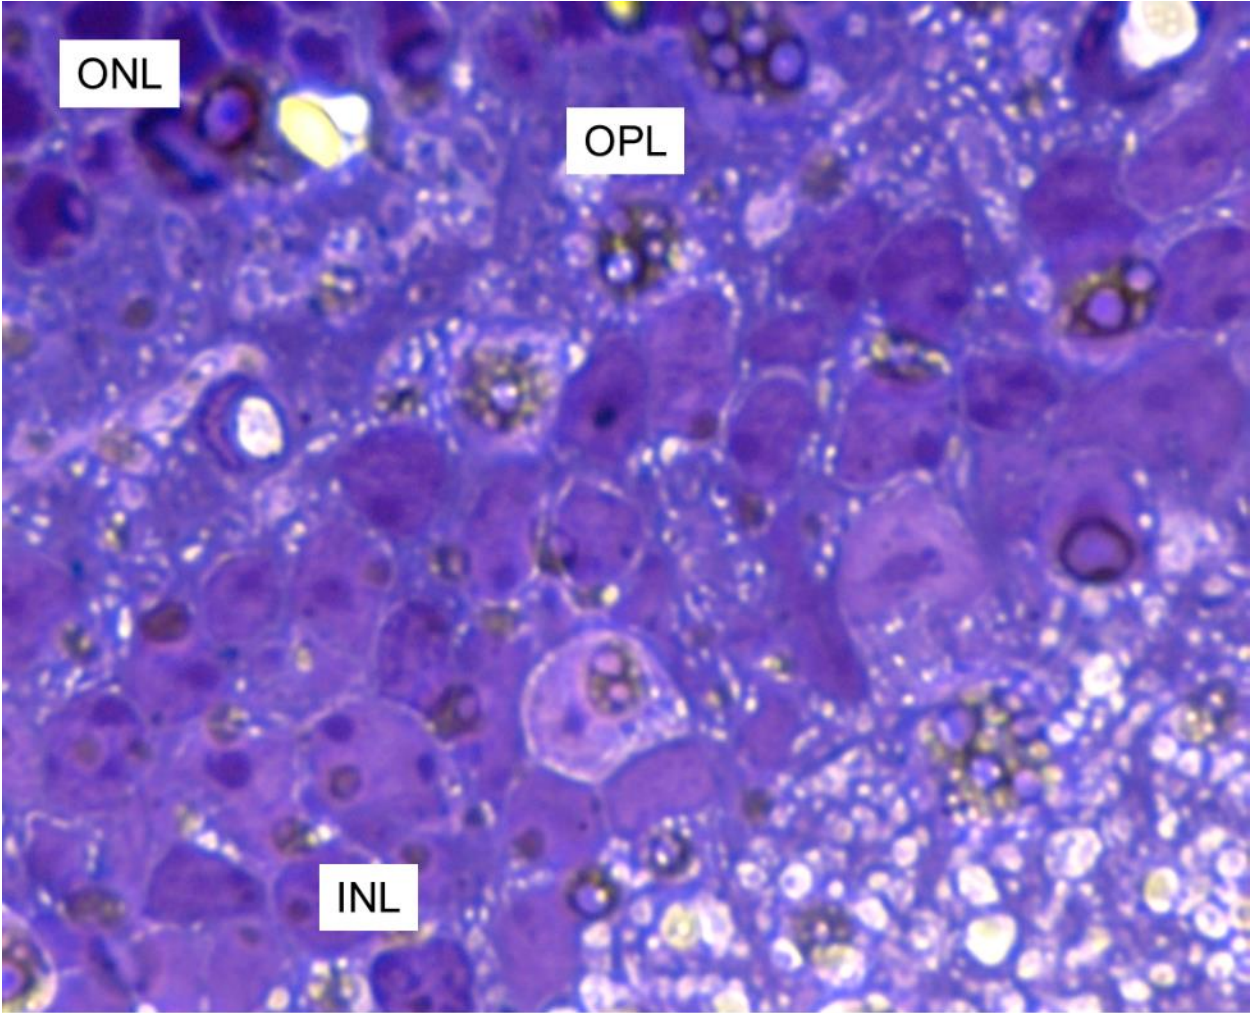

10 μm



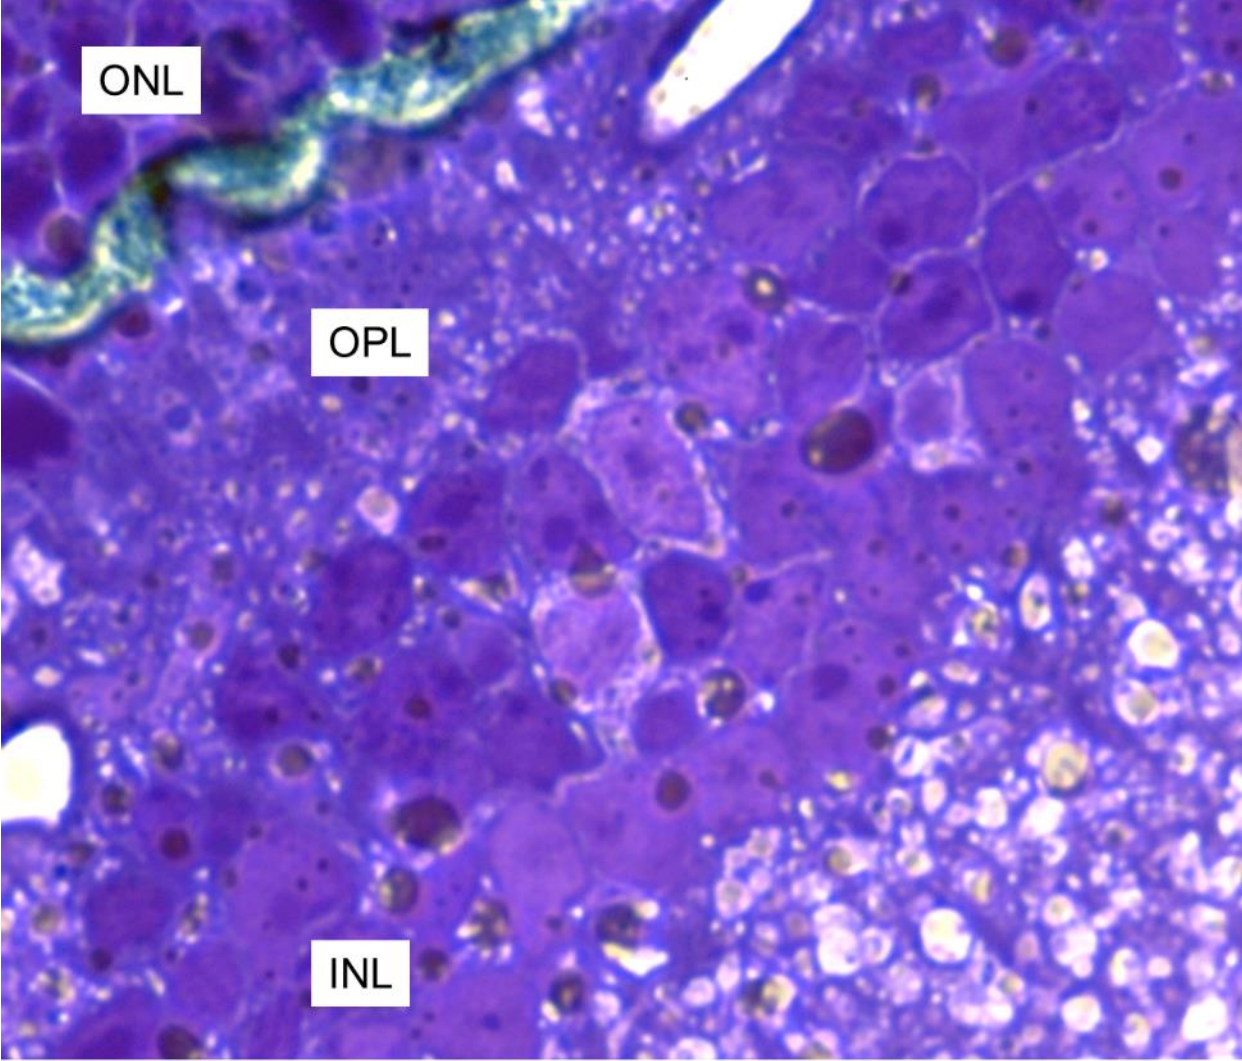

10  $\mu$ m

60 days ONL

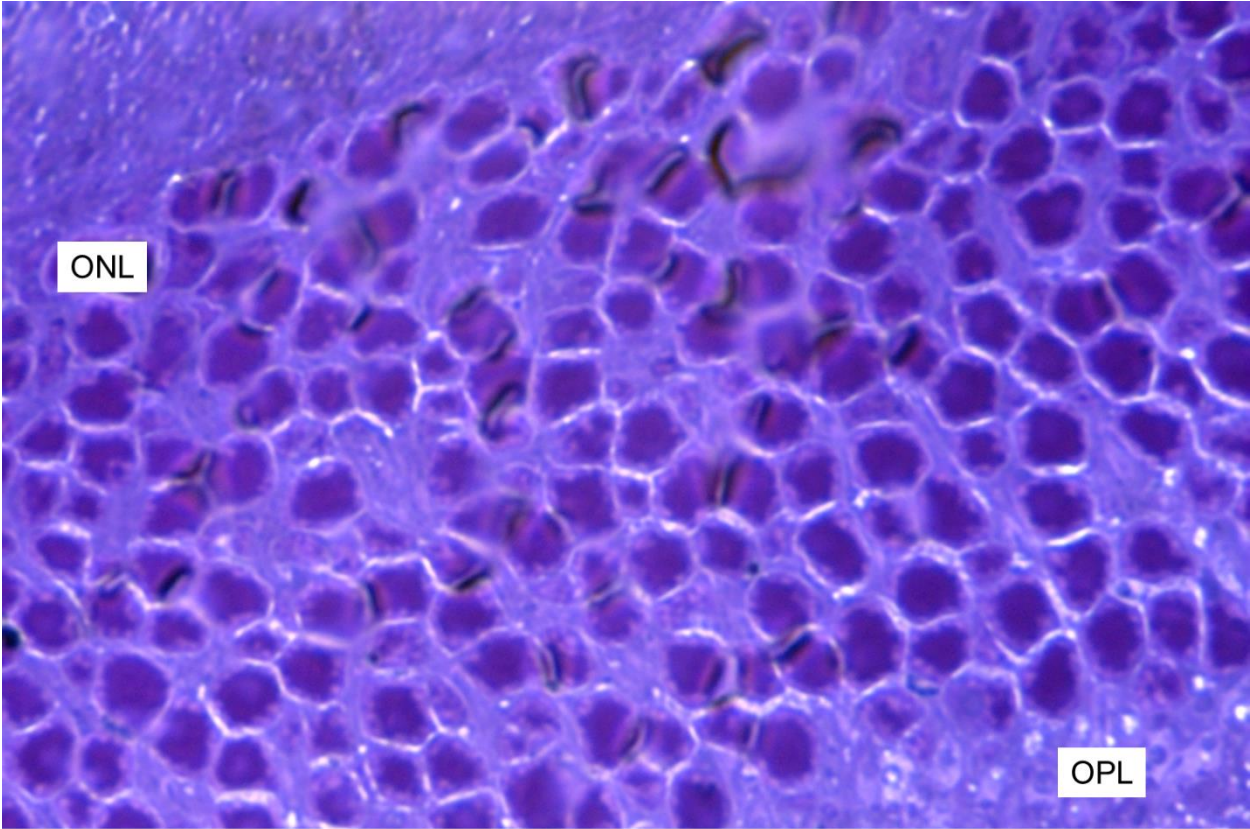

10  $\mu$ m

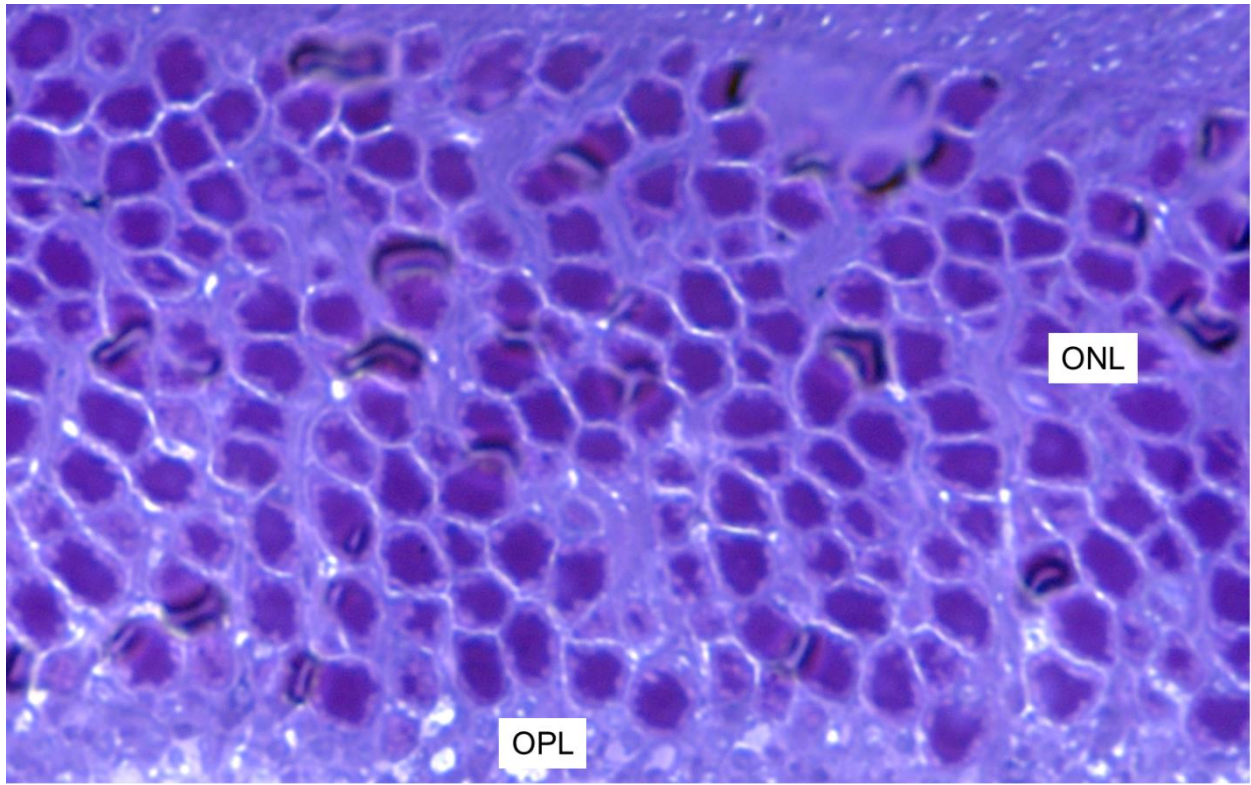

10  $\mu$ m

60 days INL

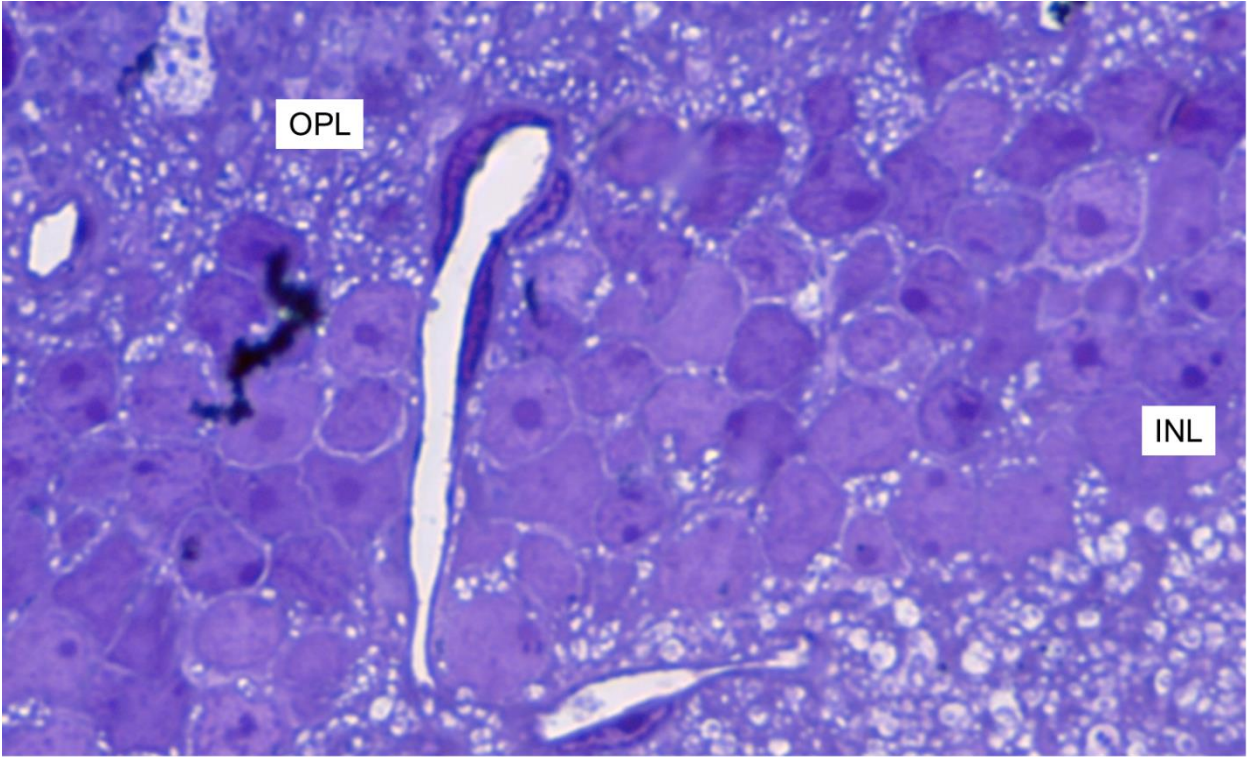

10 μm

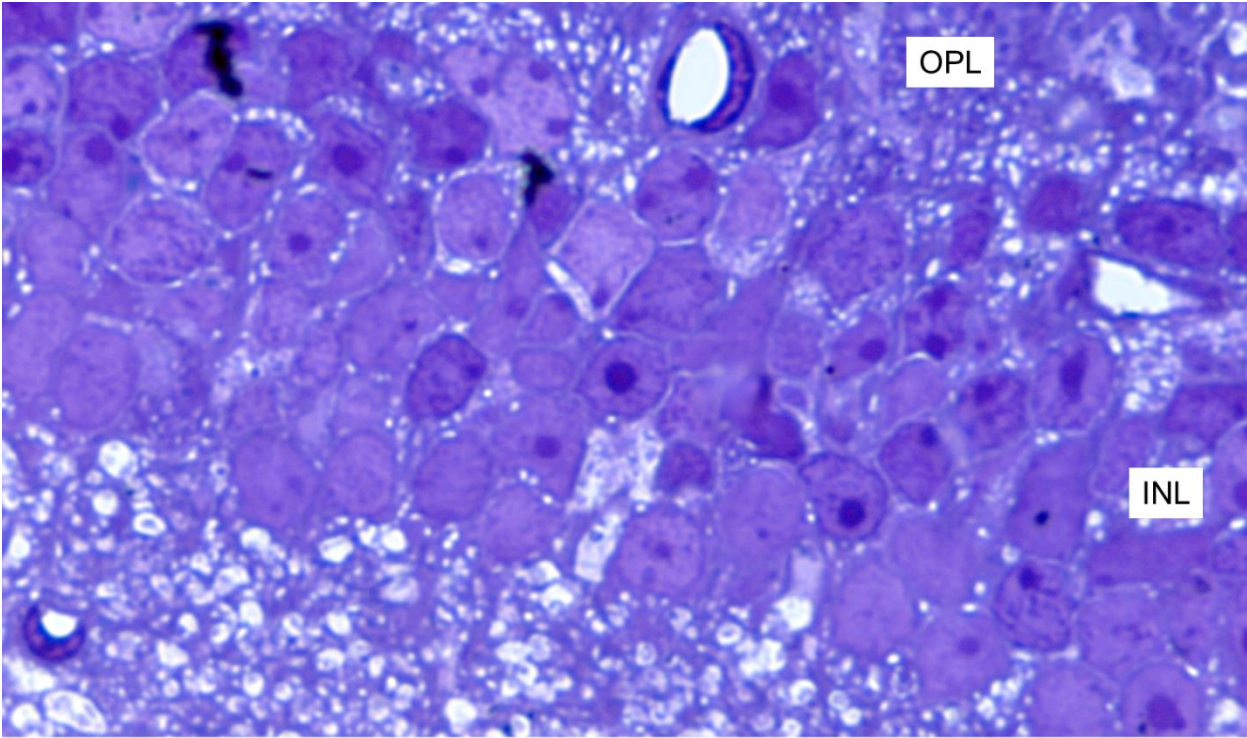

10 μm

# Histograms of Average N Ratios

5 days

### 5 day ONL Nucleus

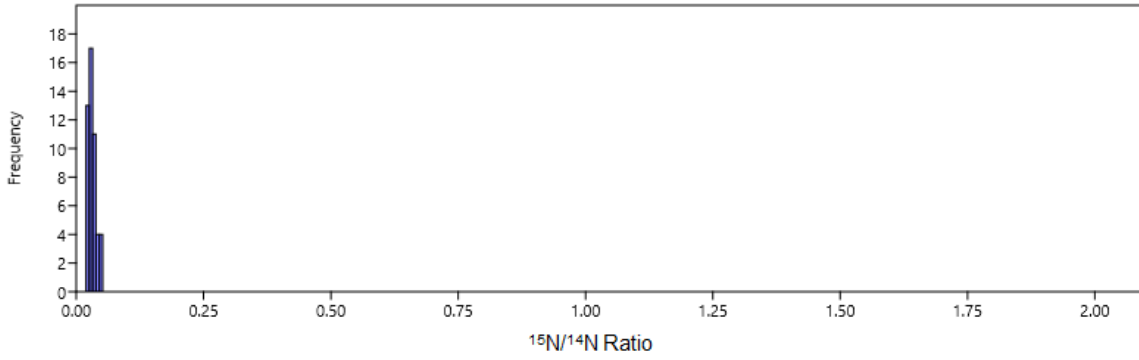

### 5 day ONL Cytosol

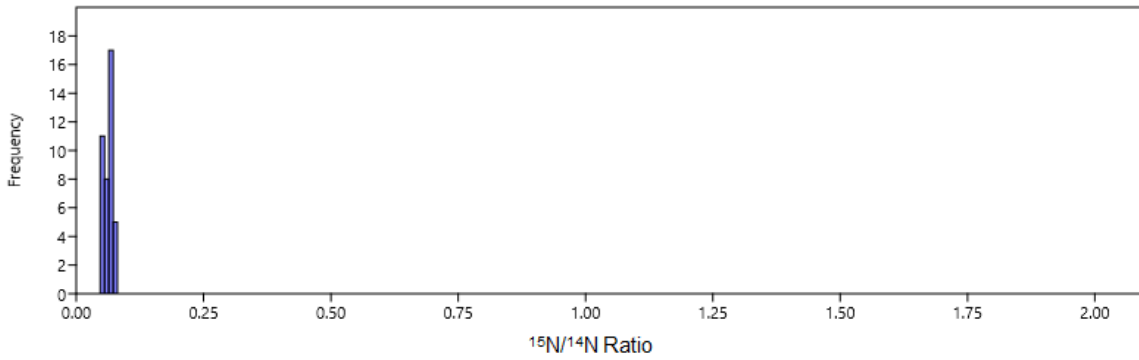

### 5 day INL Nucleus

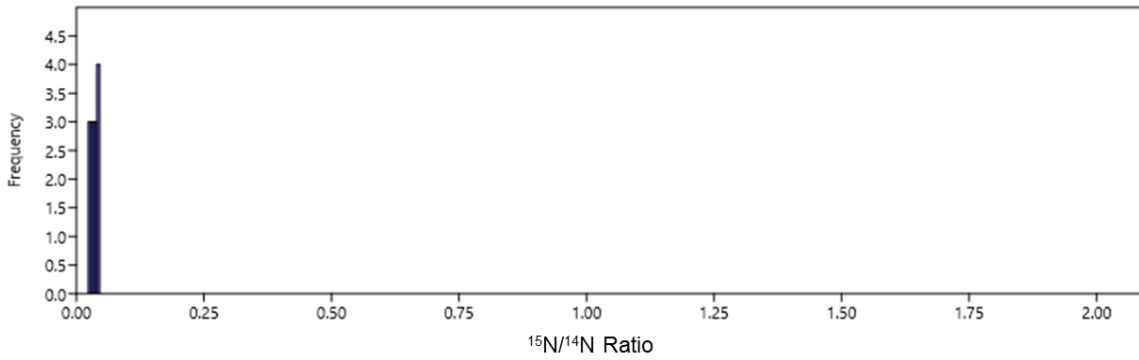



14 day ONL Cytosol

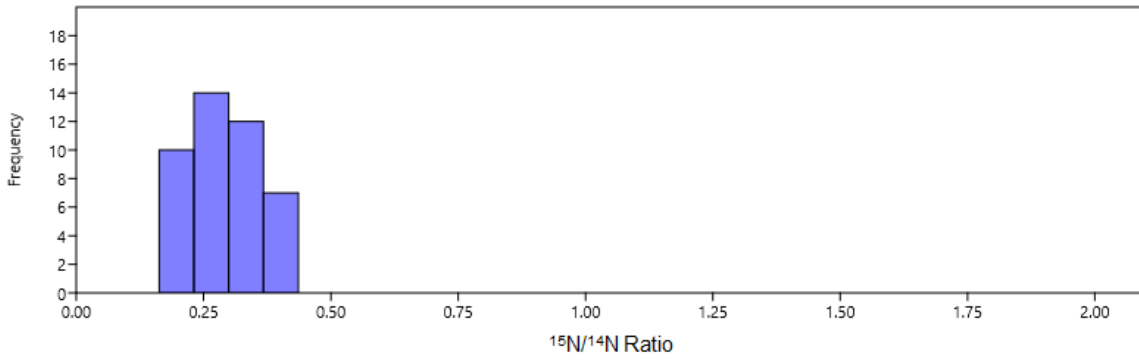

14 day INL Nucleus

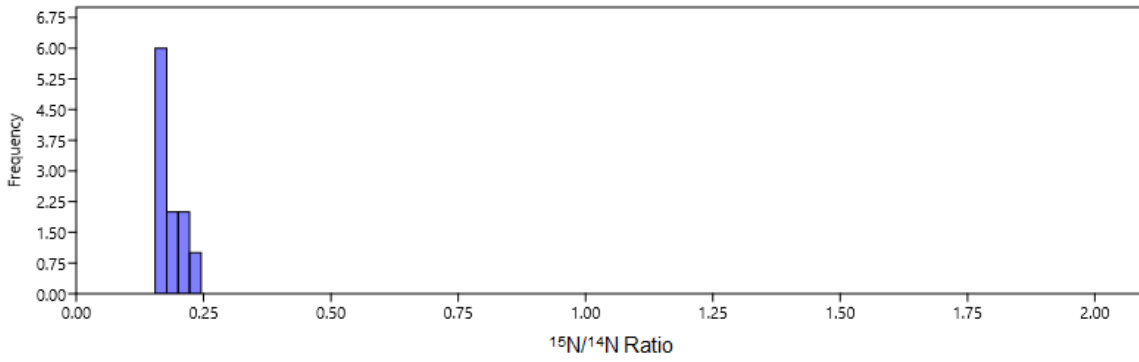

14 day INL Cytosol

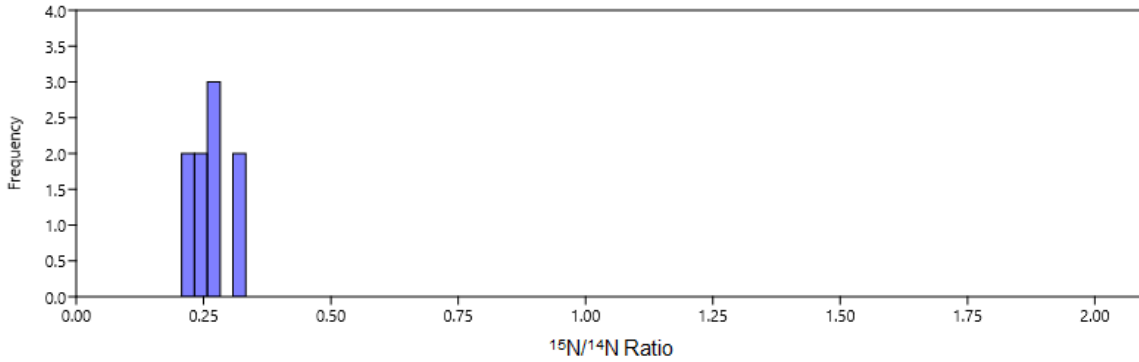

14 day OPL

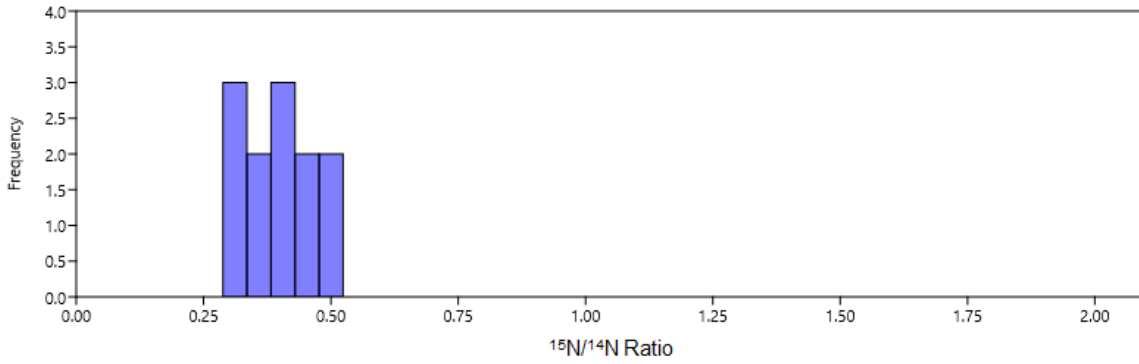

21 days

21 day ONL Nucleus

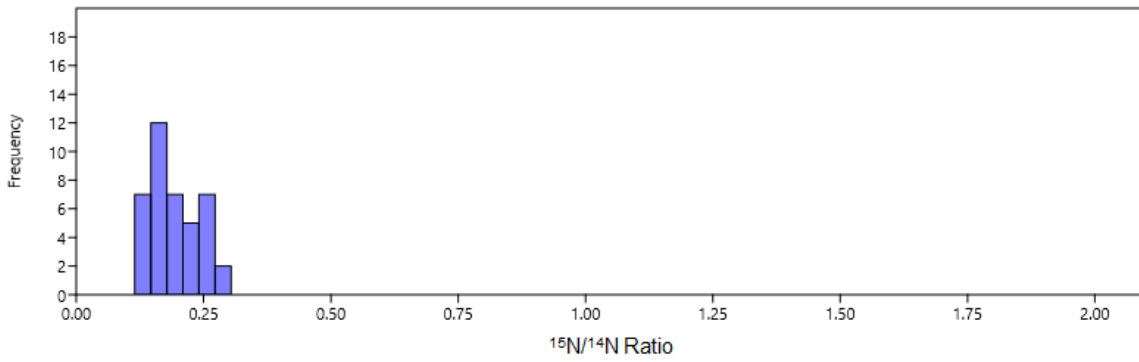

21 day ONL Cytosol

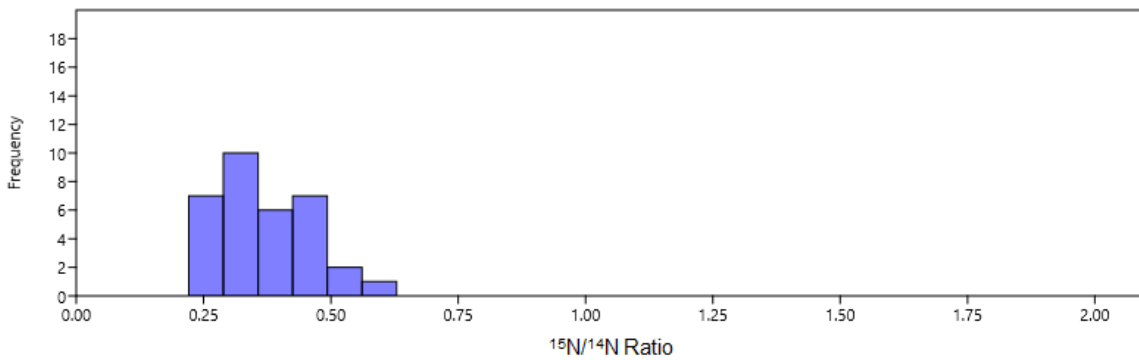



21 day INL Nucleus

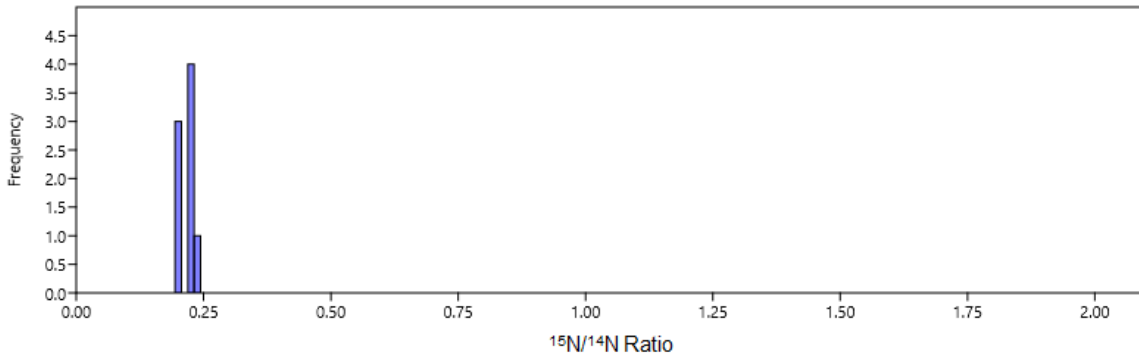

21 day INL Cytosol

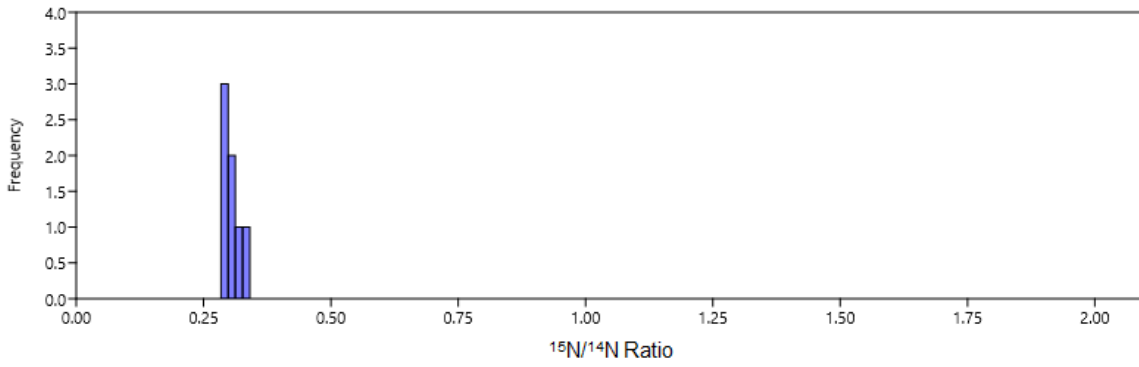

21 day OPL

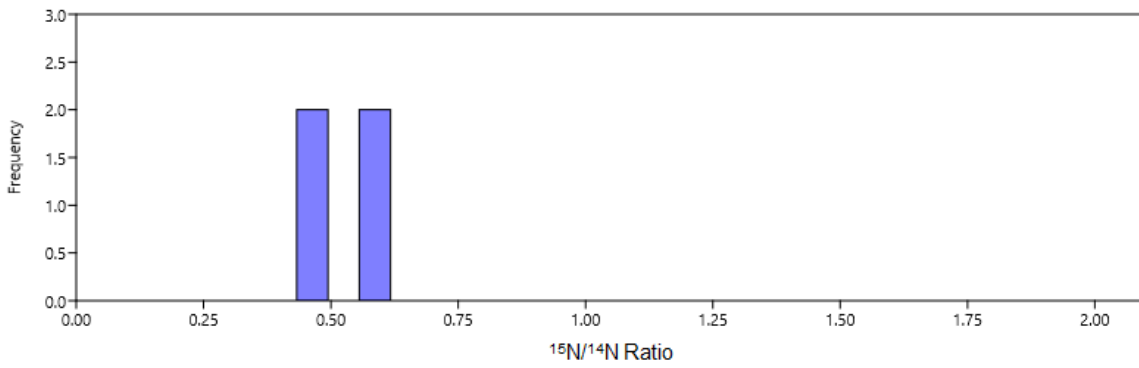

60 days

60 day ONL Nucleus

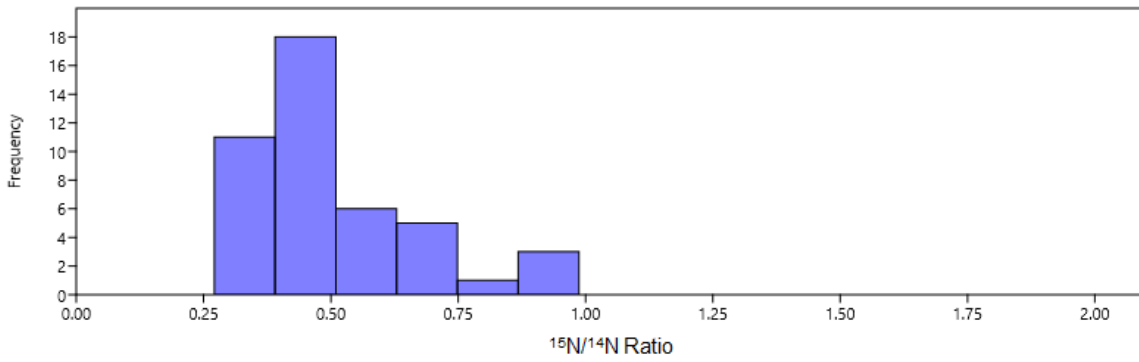

60 day ONL Cytosol

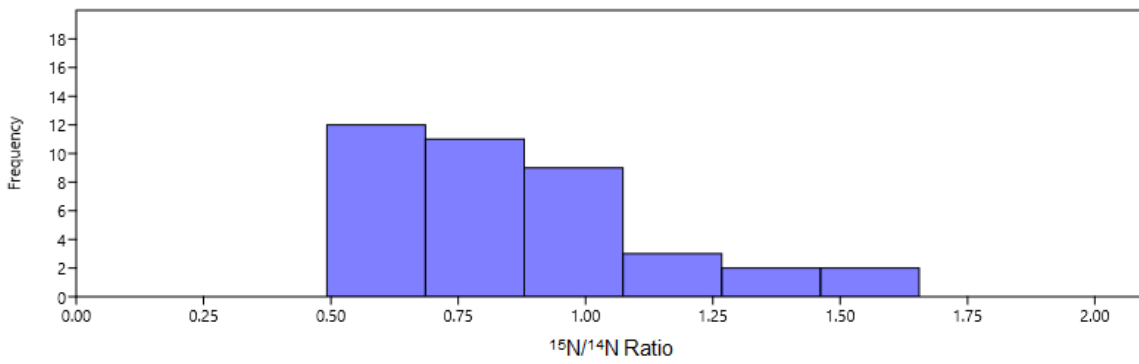

60 day INL Nucleus

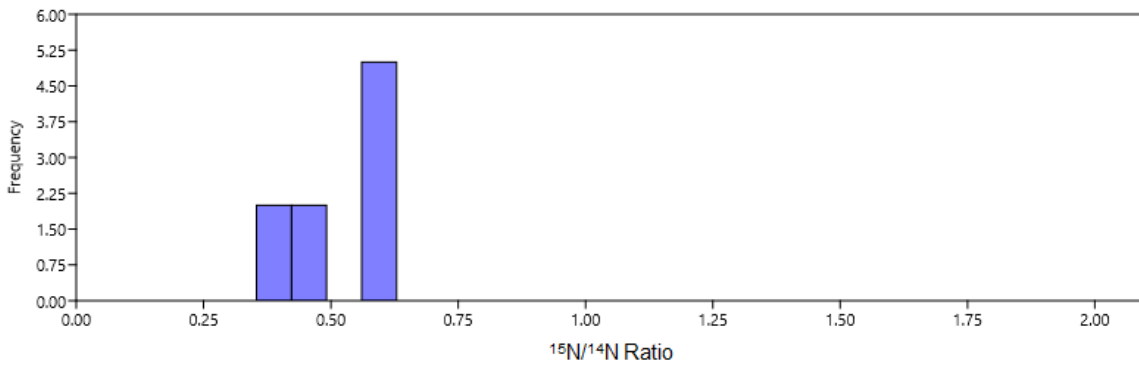

60 day INL Cytosol

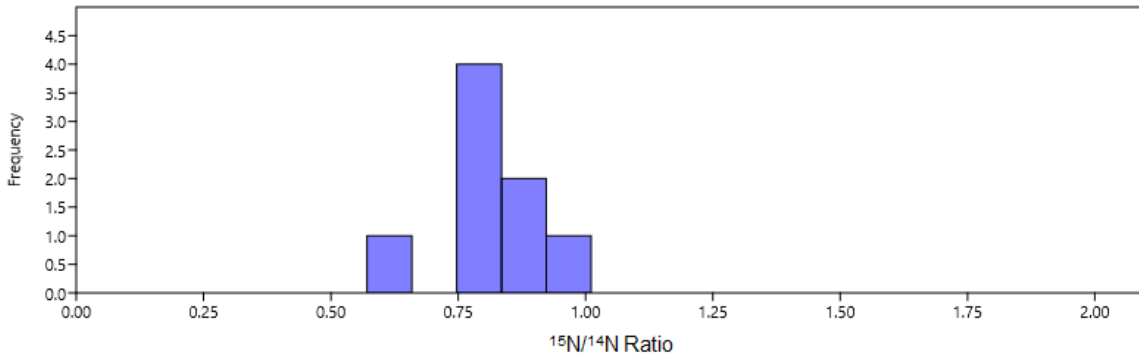

60 day OPL

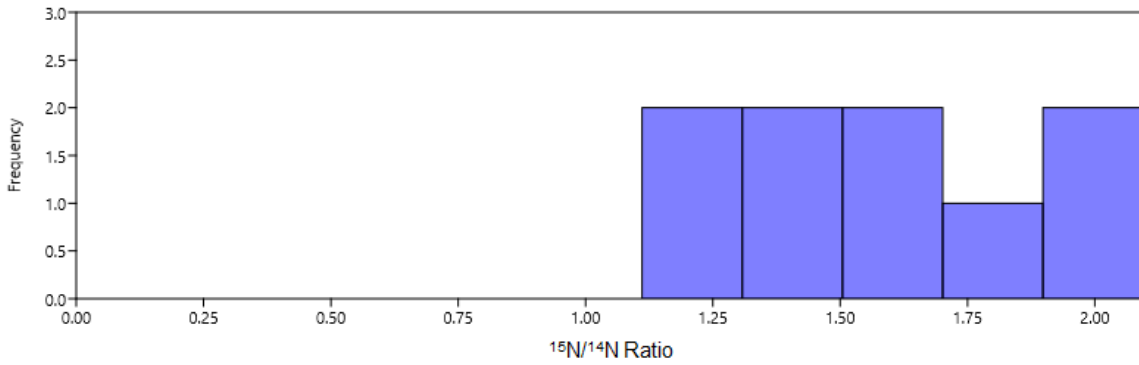

P56 Mice

P56 ONL

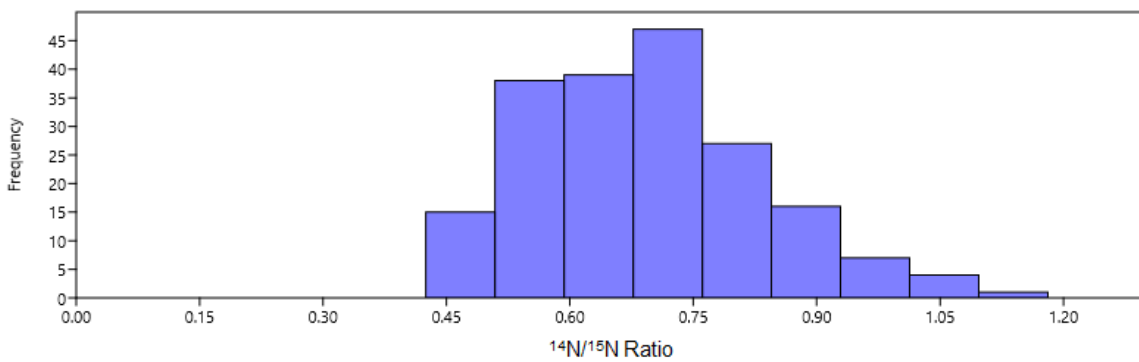

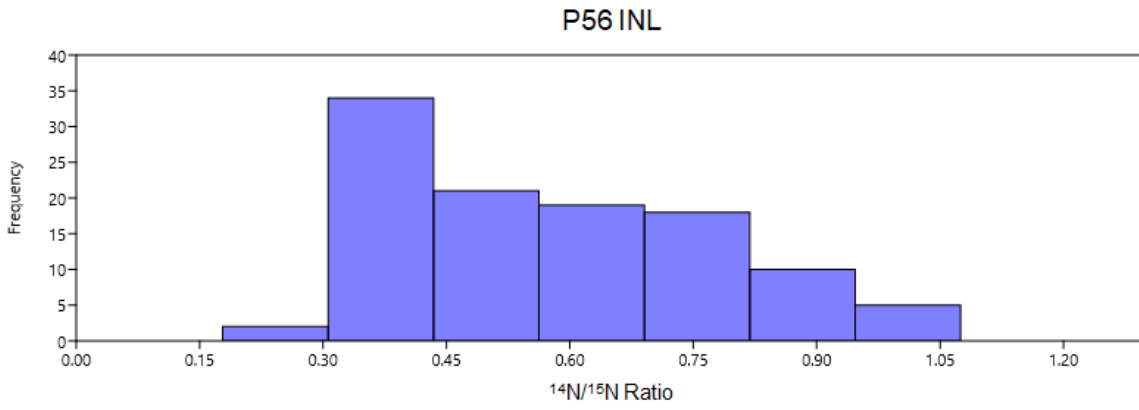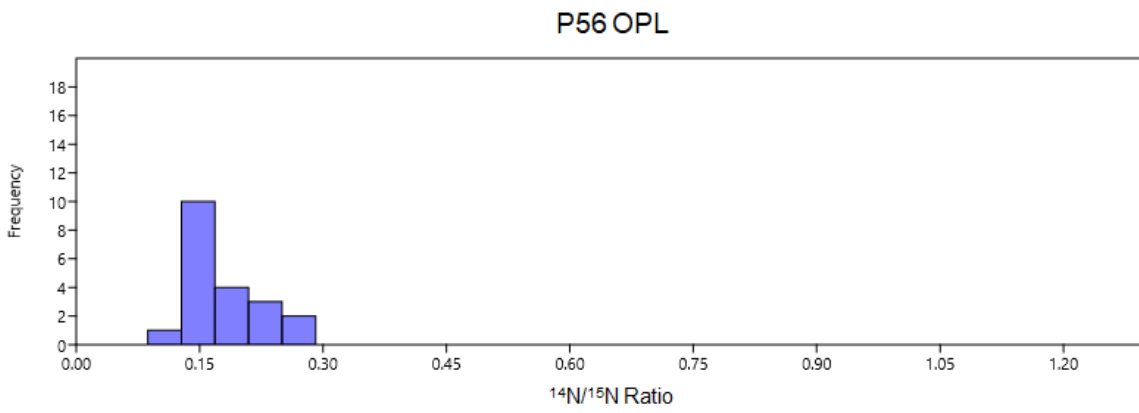

Supplement: MOESM1 [file 12860_2020_339_MOESM1_ESM.pdf]
